# Supplementary material
Source: PubMed Central journal article supplement (PMC2897461)
Supplement: supp_76_13_4151__1.pdf [file supp_76_13_4151__1.pdf]

TABLE S1. Primers used in this study.

| Primer           | Sequence (5' to 3')                                      | Modification, for use                            |
|------------------|----------------------------------------------------------|--------------------------------------------------|
| T7kan-2-SacI-F   | <u>GAGCTCCCTATAGT</u> GAGTCGTATTACCATCA<br>TCGATGAATTGTG | <u>SacI</u> , Km <sup>r</sup> gene amplification |
| T7kan-2-SacI-R   | <u>GAGCTCTGAGGCCGGTCTCCCTATAG</u>                        | <u>SacI</u> , Km <sup>r</sup> gene amplification |
| KAN-2 FP-1       | ACCTACAACAAAGCTCTCATCAACC                                | Inverse PCR                                      |
| KAN-2 RP-1       | GCAATGTAACATCAGAGATTTTGAG                                | Inverse PCR                                      |
| 3177_F-O         | CATTGTGTCAGCGAATTACC                                     | SO3177 disruption                                |
| 3177_5-O_SpeI    | ATG <u>ACTAGTCGGACATTAATCTATCTCCC</u>                    | <u>SpeI</u> , SO3177 disruption                  |
| 3177_5-I         | CTGATCGGTGCAAAAGTTCTGACTGTTACC<br>ACAAAG                 | Linker sequence, SO3177 disruption               |
| 3177_3-I         | AACTTTTGCACCGATCAGAACCGGATGATT<br>AAAGGT                 | Linker sequence, SO3177 disruption               |
| 3177_3-O-SpeI    | ACG <u>ACTAGTTCATTATTGCACTCTCGACC</u>                    | <u>SpeI</u> , SO3177 disruption                  |
| 3177_R-O         | TTCGCCAAGGAGGATAAC                                       | SO3177 disruption                                |
| SO3177-F-HindIII | ACGGA <u>AGCTT</u> GGAAGAATTAAGTTTTTTGG                  | <u>HindIII</u> , SO3177 complementation          |
| SO3177-R-XbaI    | ACCGT <u>CTAGAGTTATTTAACACCTTTAATC</u>                   | <u>XbaI</u> , SO3177 complementation             |

37,691 bp

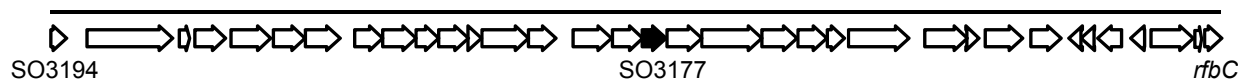

| Locus tag | Putative function                                            |
|-----------|--------------------------------------------------------------|
| SO3194    | Transcriptional activator RfaH                               |
| SO3193    | Polysaccharide export protein                                |
| SO3192    | Hypothetical protein                                         |
| SO3191    | Chain length determinant protein                             |
| SO3190    | UDP-N-acetyl-D-galactosamine dehydrogenase                   |
| SO3189    | Nucleoside-diphosphate-sugar epimerase                       |
| SO3188    | <i>rfbB</i> , dTDP-glucose 4,6 dehydratase                   |
| SO3186    | <i>rfbA</i> , glucose-1-phosphate-thymidyltransferase        |
| SO3185    | Sugar transamine/perosamine synthetase                       |
| SO3184    | Hypothetical protein                                         |
| SO3183    | Perosamine synthetase-related protein                        |
| SO3182    | Acetyltransferase                                            |
| SO3181    | Polysaccharide biosynthesis domain-containing protein        |
| SO3180    | Glycosyl transferase, group 2 family protein                 |
| SO3179    | Lipopolysaccharide biosynthesis polymerase                   |
| SO3178    | Hypothetical protein                                         |
| SO3177    | Formyl transferase domain-containing protein                 |
| SO3176    | Glycosyl transferase, group 1 family protein                 |
| SO3175    | <i>asnB-2</i> , asparagine synthetase, glutamine-hydrolyzing |
| SO3174    | Glycosyl transferase, group 1 family protein                 |
| SO3173    | UDP-galactose 4-epimerase                                    |
| SO3172    | Galactosyl transferase                                       |
| SO3171    | Polysaccharide biosynthesis protein                          |
| SO3170    | Hypothetical protein                                         |
| SO3169    | Cro/CI family transcriptional regulator                      |
| SO3168    | DnaJ domain-containing protein                               |
| SO3167    | dTDP-glucose 4,6-dehydratase                                 |
| SO3166    | Conserved hypothetical protein                               |
| SO3165    | Conserved hypothetical protein                               |
| SO3164    | Conserved hypothetical protein                               |
| SO3163    | Lipoprotein                                                  |
| SO3162    | Sensor histidine kinase                                      |
| SO3161    | Glucose-1-phosphate thymidyltransferase                      |
| SO3160    | <i>rfbC</i> , dTDP-4-dehydrorhamnose 3,5-epimerase           |

FIG. S1. Putative polysaccharide biosynthesis gene cluster, including SO3177, in the genome of *S. oneidensis* MR-1. ORFs are indicated in order of locus tag from the left.

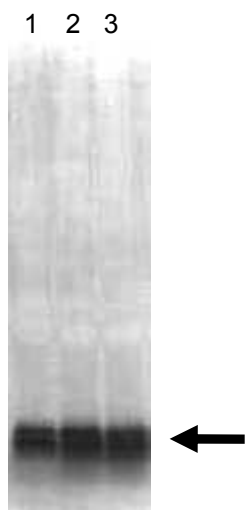

FIG. S2. Silver-stained SDS-PAGE gel, showing sizes of LPSs extracted from the wild-type MR-1 (lane 1), 4A (lane 2), and  $\Delta$ SO3177 (lane 3). The arrow indicates the positions of LPSs from *S. oneidensis*.
